# Supplementary material for: Incorporation of Zinc into Binary SiO2-CaO Mesoporous Bioactive Glass Nanoparticles Enhances Anti-Inflammatory and Osteogenic Activities
Source: MDPI journal article supplement (doi:10.3390/pharmaceutics13122124), 2021-12-09
Supplement: s1 [file s1]

# Supplementary Materials: Incorporation of Zinc into Binary SiO<sub>2</sub>-CaO Mesoporous Bioactive Glass Nanoparticles Enhances Anti-Inflammatory and Osteogenic Activities

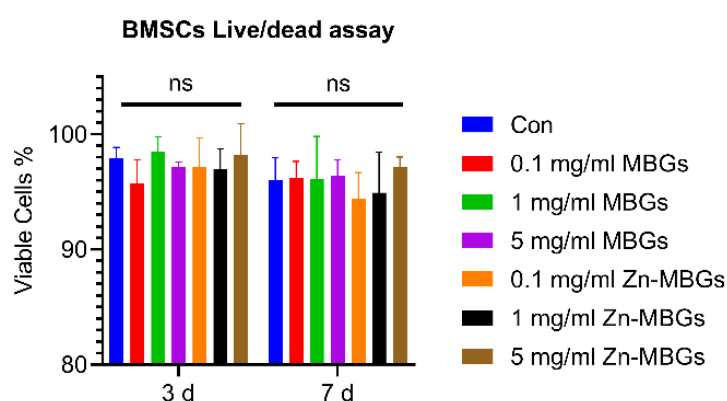

**Figure S1.** Concentrations of living cells in the live/dead staining of BMSCs after culture with the extracts for 3 and 7 days.

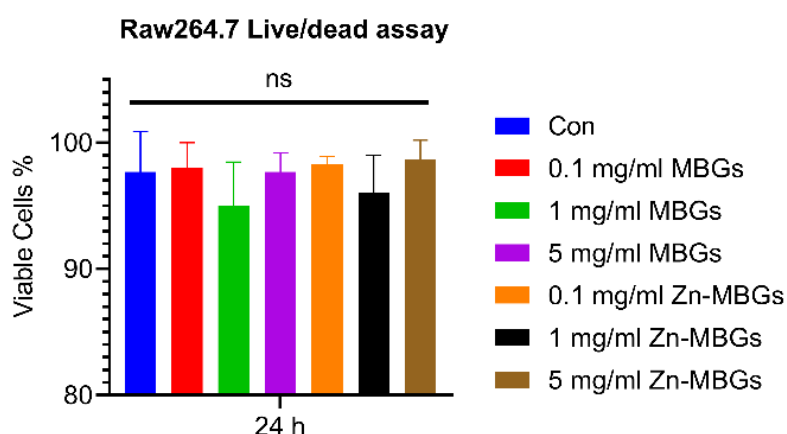

**Figure S2.** Concentrations of living cells from the live/dead staining of RAW 264.7 cells after culture with the extracts for 24 h

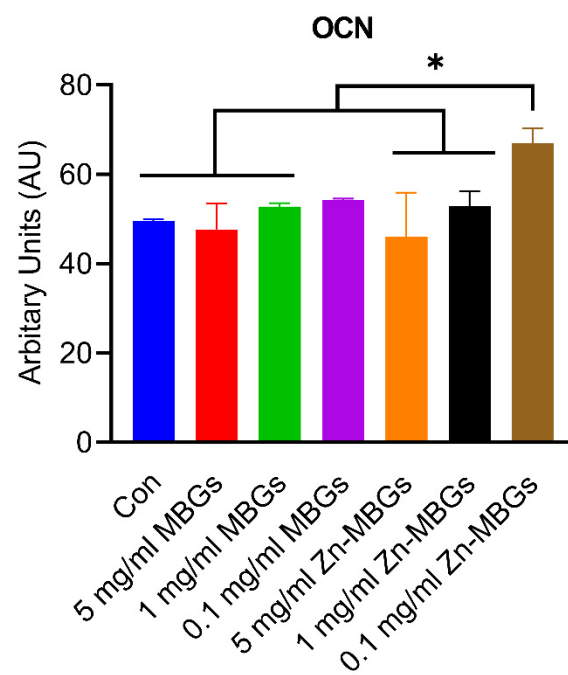

**Figure S3.** Quantitative analysis of OCN expression in BMSCs after culture with the extracts of MBGs and Zn-MBGs for 14 days.
